# Supplementary material for: The potential of peptide dendron functionalized and gadolinium loaded mesoporous silica nanoparticles as magnetic resonance imaging contrast agents
Source: Royal Society of Chemistry journal article supplement (doi:10.1039/c5tb02709h), 2016-01-01
Supplement: c5tb02709h1.pdf [file c5tb02709h1.pdf]

## Supplementary Information

The Potential of Peptide Dendron Functionalized and Gadolinium Loaded  
Mesoporous Silica Nanoparticles as Magnetic Resonance Imaging Contrast Agents

Chunhua Guo,<sup>a</sup> Jiani Hu,<sup>b</sup> Ashika Bains,<sup>b</sup> Dayi Pan,<sup>a</sup> Kui Luo,<sup>\*a</sup> Ning Li,<sup>a</sup> and  
Zhongwei Gu<sup>\*a</sup>

<sup>a</sup>National Engineering Research Center for Biomaterials, Sichuan University, Chengdu  
610064, China

<sup>b</sup>Department of Radiology, Wayne State University, Detroit, MI 48201, USA

\*Corresponding authors. Gu is to be contacted at Tel.: +86 28 85410336; fax: +86 28  
85410653. Luo, Tel./fax: +86 28 85410653.

E-mail addresses: [zwgu@scu.edu.cn](mailto:zwgu@scu.edu.cn) (Z. Gu), [luokui@scu.edu.cn](mailto:luokui@scu.edu.cn) (K. Luo).

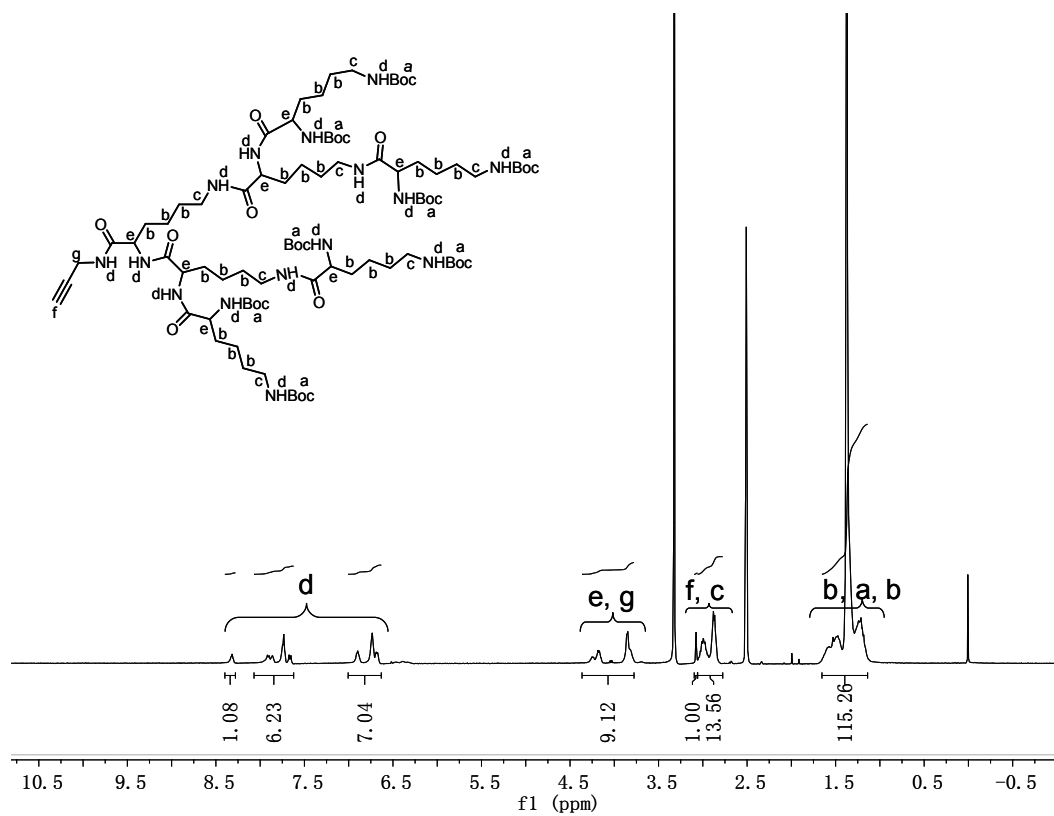

Fig. S1. <sup>1</sup>H NMR spectra of Dendron G3.

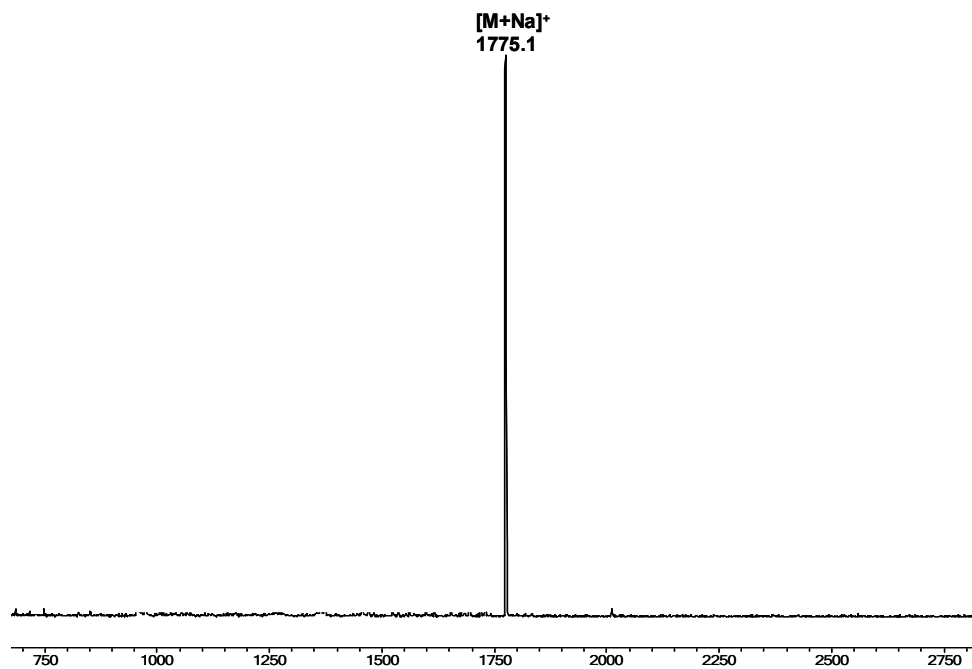

Fig. S2. Mass spectrum of Dendron G3, obtained from MALDI-TOF MS.

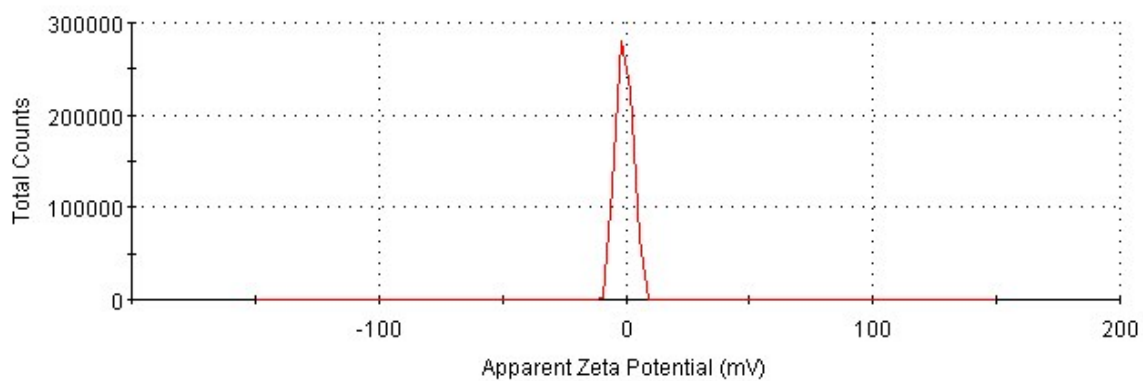

**Fig. S3.** The zeta potential of Compound 3 (-0.2 mV).

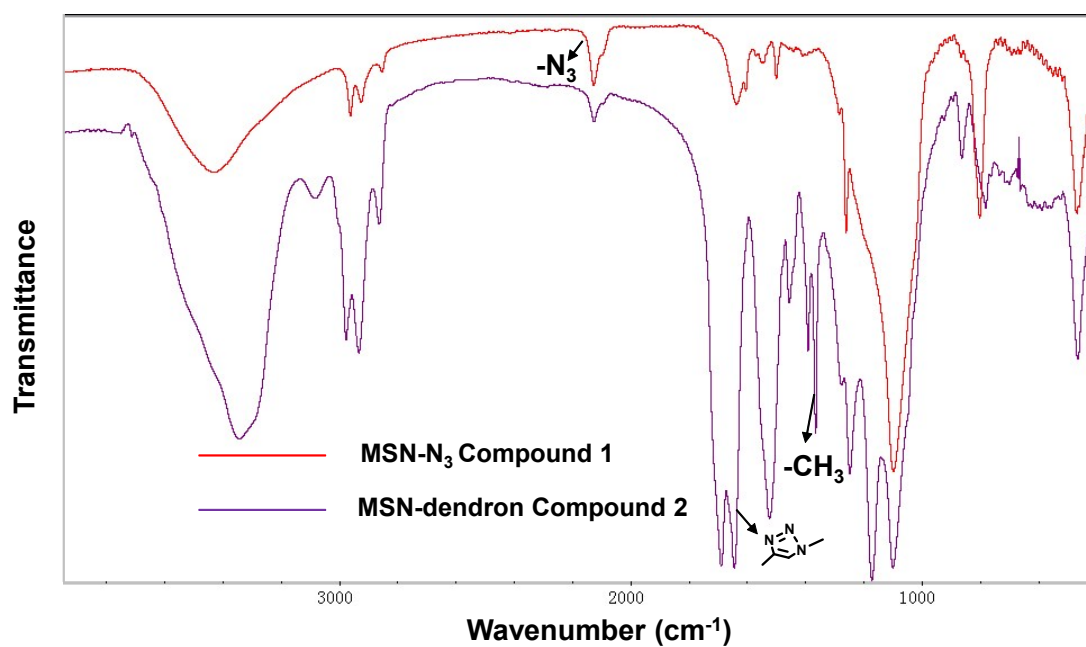

**Fig. S4.** The IR spectra of Compound 1 (red line) and Compound 2 (purple line).

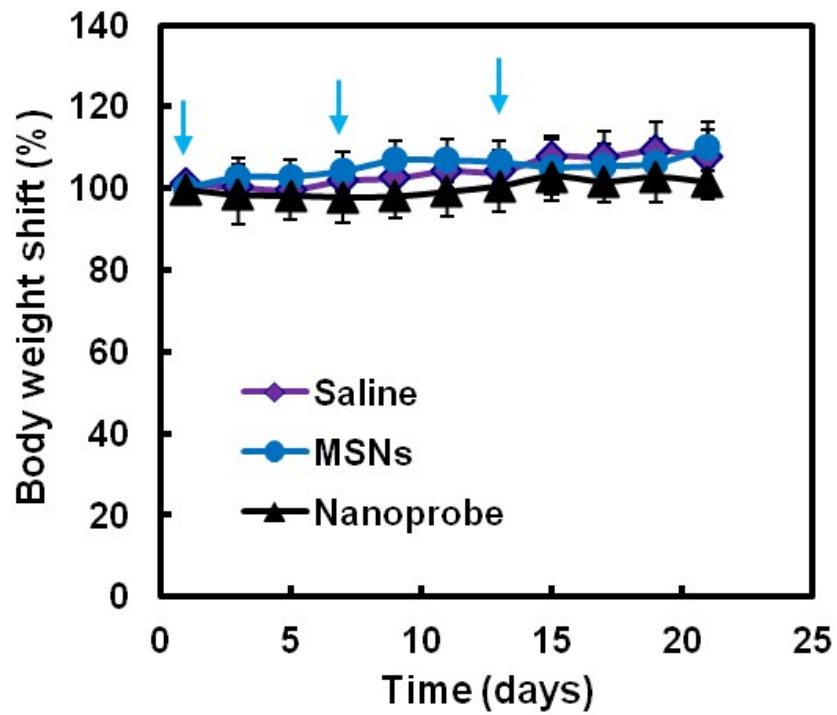

**Fig. S5.** Normal animal body weight shifts post-injection of saline as control, MSNs, and MSNs-dendron-Gd nanoprobe up to day 21. (n = 5 mice per group).
